# Supplementary material for: The chloroplast genome inheritance pattern of the Deli-Nigerian prospection material (NPM) × Yangambi population of Elaeis guineensis Jacq
Source: PeerJ. 2024 May 27;12:e17335. doi: 10.7717/peerj.17335 (PMC11138521; doi:10.7717/peerj.17335)
Supplement: Table S5 — Information on the location for each SSR found in the chlorop[lsat genome of J4-25 individual. [file peerj-12-17335-s005.xls]

## Sheet: ALL
	Table S5. Details on SSR Positions in J4-25 chloroplast genome.
ID	SSR nr.	SSR type	SSR	size	start	end	location	region
OR125033.1_Elaeis_guineensis_isolate_J425_chloroplast,_complete_genome	1	p1	(A)11	11	4595	4605	trnK-UUU - rps16	intergenic
OR125033.1_Elaeis_guineensis_isolate_J425_chloroplast,_complete_genome	2	p1	(T)10	10	4807	4816	trnK-UUU - rps16	intergenic
OR125033.1_Elaeis_guineensis_isolate_J425_chloroplast,_complete_genome	3	c	(TCTA)3tggatag(ATCT)3	31	6069	6099	rps16 - trnQ-UUG	intergenic
OR125033.1_Elaeis_guineensis_isolate_J425_chloroplast,_complete_genome	4	p6	(TCCCCA)3	18	8375	8392	trnS-GCU - trnG-UCC	intergenic
OR125033.1_Elaeis_guineensis_isolate_J425_chloroplast,_complete_genome	5	p2	(AT)7	14	8592	8605	trnS-GCU - trnG-UCC	intergenic
OR125033.1_Elaeis_guineensis_isolate_J425_chloroplast,_complete_genome	6	p1	(A)10	10	9206	9215	trnS-GCU - trnG-UCC	intergenic
OR125033.1_Elaeis_guineensis_isolate_J425_chloroplast,_complete_genome	7	p1	(T)10	10	12741	12750	atpF (intron)	intron
OR125033.1_Elaeis_guineensis_isolate_J425_chloroplast,_complete_genome	8	p1	(T)10	10	12993	13002	atpF (intron)	intron
OR125033.1_Elaeis_guineensis_isolate_J425_chloroplast,_complete_genome	9	c	(AT)7agggtatataata(AT)8	43	14781	14823	atpH - atpI	intergenic
OR125033.1_Elaeis_guineensis_isolate_J425_chloroplast,_complete_genome	10	p1	(T)10	10	16900	16909	rps2 - rpoC2	intergenic
OR125033.1_Elaeis_guineensis_isolate_J425_chloroplast,_complete_genome	11	c	(T)10ccgtctctggtggtatcaaaatgccgcagtgcctggatatcttatctgtttctccaggaaaatgaatatctccagaaaagattttcagttcaatac(T)11	117	18977	19093	rpoC2	protein coding
OR125033.1_Elaeis_guineensis_isolate_J425_chloroplast,_complete_genome	12	p2	(AT)5	10	20447	20456	rpoC2	protein coding
OR125033.1_Elaeis_guineensis_isolate_J425_chloroplast,_complete_genome	13	p1	(T)11	11	23207	23217	rpoC1 (intron)	intron
OR125033.1_Elaeis_guineensis_isolate_J425_chloroplast,_complete_genome	14	p1	(T)10	10	23522	23531	rpoC1 (intron)	intron
OR125033.1_Elaeis_guineensis_isolate_J425_chloroplast,_complete_genome	15	p5	(ATGTA)4	20	27549	27568	rpoB - trnC-GCA	intergenic
OR125033.1_Elaeis_guineensis_isolate_J425_chloroplast,_complete_genome	16	c	(A)10taaaagattccttggtttcgttttctttta(T)10atattttatttttatatagtta(AT)8tct(TA)9	109	29617	29725	petN - psbM	intergenic
OR125033.1_Elaeis_guineensis_isolate_J425_chloroplast,_complete_genome	17	p1	(A)10	10	29851	29860	petN - psbM	intergenic
OR125033.1_Elaeis_guineensis_isolate_J425_chloroplast,_complete_genome	18	p1	(T)10	10	32081	32090	trnT-GGU - psbD	intergenic
OR125033.1_Elaeis_guineensis_isolate_J425_chloroplast,_complete_genome	19	p1	(A)10	10	36717	36726	trnG-GCC - trnfM-CAU	intergenic
OR125033.1_Elaeis_guineensis_isolate_J425_chloroplast,_complete_genome	20	p1	(T)11	11	37238	37248	rps14	protein coding
OR125033.1_Elaeis_guineensis_isolate_J425_chloroplast,_complete_genome	21	p1	(C)10	10	40426	40435	psaA	protein coding
OR125033.1_Elaeis_guineensis_isolate_J425_chloroplast,_complete_genome	22	p5	(TATTT)3	15	42080	42094	psaA - pafI	intergenic
OR125033.1_Elaeis_guineensis_isolate_J425_chloroplast,_complete_genome	23	p1	(A)12	12	43113	43124	pafI (intron)	intron
OR125033.1_Elaeis_guineensis_isolate_J425_chloroplast,_complete_genome	24	p2	(TA)5	10	46736	46745	trnT-UGU - trnL-UAA	intergenic
OR125033.1_Elaeis_guineensis_isolate_J425_chloroplast,_complete_genome	25	p2	(TA)5	10	46965	46974	trnT-UGU - trnL-UAA	intergenic
OR125033.1_Elaeis_guineensis_isolate_J425_chloroplast,_complete_genome	26	c	(A)10gaagaatgaatatcgaccgttccagtattccaaatcgcactgtaaaaaagaaagggagggagaaac(AT)5	86	47225	47310	trnT-UGU - trnL-UAA	intergenic
OR125033.1_Elaeis_guineensis_isolate_J425_chloroplast,_complete_genome	27	p2	(AT)7	14	47886	47899	trnL-UAA (intron)	intron
OR125033.1_Elaeis_guineensis_isolate_J425_chloroplast,_complete_genome	28	p2	(AT)5	10	48815	48824	trnF-GAA - ndhJ	intergenic
OR125033.1_Elaeis_guineensis_isolate_J425_chloroplast,_complete_genome	29	p1	(A)11	11	51602	51612	ndhC - trnV-UAC	intergenic
OR125033.1_Elaeis_guineensis_isolate_J425_chloroplast,_complete_genome	30	p1	(T)10	10	53776	53785	trnM-CAU - atpA	intergenic
OR125033.1_Elaeis_guineensis_isolate_J425_chloroplast,_complete_genome	31	p1	(A)10	10	59420	59429	accD	protein coding
OR125033.1_Elaeis_guineensis_isolate_J425_chloroplast,_complete_genome	32	p1	(A)10	10	60305	60314	accD - psaI	intergenic
OR125033.1_Elaeis_guineensis_isolate_J425_chloroplast,_complete_genome	33	c	(A)10gaaagccttggtctccctcccatatatttcatccataatatttttgccctggtggg(TC)5	76	62046	62121	pafII - cemA	intergenic
OR125033.1_Elaeis_guineensis_isolate_J425_chloroplast,_complete_genome	34	p4	(AATG)3	12	62722	62733	cemA	protein coding
OR125033.1_Elaeis_guineensis_isolate_J425_chloroplast,_complete_genome	35	p1	(A)10	10	67754	67763	trnP-UGG - psaJ	intergenic
OR125033.1_Elaeis_guineensis_isolate_J425_chloroplast,_complete_genome	36	c	(AGGAAG)3aacttaacatatttaagttaacatatttaacttaacataaatataacatatataatatacataatatatacaatacaaatcaaacccgatttcattttc(AT)7	131	68750	68880	rpl33 - rps18	intergenic
OR125033.1_Elaeis_guineensis_isolate_J425_chloroplast,_complete_genome	37	p1	(T)10	10	70162	70171	rpl20 - rps12	intergenic
OR125033.1_Elaeis_guineensis_isolate_J425_chloroplast,_complete_genome	38	p1	(T)10	10	71487	71496	clpP1 (intron)	intron
OR125033.1_Elaeis_guineensis_isolate_J425_chloroplast,_complete_genome	39	p4	(ATAA)3	12	71948	71959	clpP1 (exon)	protein coding
OR125033.1_Elaeis_guineensis_isolate_J425_chloroplast,_complete_genome	40	c	(T)11ctgtaacaggtttttgtttttctaatgaagggggttttcttcttctatttttcaaaaaacataagatgagtttttgttcccttacctat(A)10	110	72187	72296	clpP1 (intron)	intron
OR125033.1_Elaeis_guineensis_isolate_J425_chloroplast,_complete_genome	41	p1	(A)11	11	76106	76116	petB (intron)	intron
OR125033.1_Elaeis_guineensis_isolate_J425_chloroplast,_complete_genome	42	p4	(AAAT)3	12	76422	76433	petB (intron)	intron
OR125033.1_Elaeis_guineensis_isolate_J425_chloroplast,_complete_genome	43	p1	(T)12	12	80830	80841	rpl36 - infA	intergenic
OR125033.1_Elaeis_guineensis_isolate_J425_chloroplast,_complete_genome	44	p1	(T)15	15	81699	81713	rps8 - rpl14	intergenic
OR125033.1_Elaeis_guineensis_isolate_J425_chloroplast,_complete_genome	45	p2	(TA)5	10	82907	82916	rpl16 (intron)	intron
OR125033.1_Elaeis_guineensis_isolate_J425_chloroplast,_complete_genome	46	c	(T)10ctttttttttatat(TTTA)3	36	83445	83480	rpl16 (intron)	intron
OR125033.1_Elaeis_guineensis_isolate_J425_chloroplast,_complete_genome	47	p1	(T)20	20	83818	83837	rpl16 (intron)	intron
OR125033.1_Elaeis_guineensis_isolate_J425_chloroplast,_complete_genome	48	p1	(A)10	10	84785	84794	rpl22	protein coding
OR125033.1_Elaeis_guineensis_isolate_J425_chloroplast,_complete_genome	49	p1	(T)10	10	85218	85227	rpl22 - rps19	intergenic
OR125033.1_Elaeis_guineensis_isolate_J425_chloroplast,_complete_genome	50	p1	(C)10	10	112320	112329	ndhF	protein coding
OR125033.1_Elaeis_guineensis_isolate_J425_chloroplast,_complete_genome	51	p2	(AT)11	22	114566	114587	ndhF - rpl23	intergenic
OR125033.1_Elaeis_guineensis_isolate_J425_chloroplast,_complete_genome	52	p1	(T)10	10	115359	115368	rpl32 - trnL-UAG	intergenic
OR125033.1_Elaeis_guineensis_isolate_J425_chloroplast,_complete_genome	53	p4	(AATA)3	12	117275	117286	ndhD	protein coding
OR125033.1_Elaeis_guineensis_isolate_J425_chloroplast,_complete_genome	54	c	(AT)6tttatatttatattttatttatatttatattttatatatttataataatataataataaaaatcaaaataataaaatt(ATA)4	102	119261	119362	psaC - ndhE	intergenic
OR125033.1_Elaeis_guineensis_isolate_J425_chloroplast,_complete_genome	55	p4	(TTTA)3	12	120125	120136	ndhE - ndhG	intergenic
OR125033.1_Elaeis_guineensis_isolate_J425_chloroplast,_complete_genome	56	p1	(T)10	10	120843	120852	ndhG - ndhI	intergenic
OR125033.1_Elaeis_guineensis_isolate_J425_chloroplast,_complete_genome	57	c	(AT)5gcattagttcatgaataatgataagaattccgtatgtatgaatacggatataggaaagaaagaataaataaagatctttttttattttataaaaattttt(ATTC)3	122	122520	122641	ndhA (intron)	intron
OR125033.1_Elaeis_guineensis_isolate_J425_chloroplast,_complete_genome	58	p2	(TC)5	10	124582	124591	ndhH	protein coding
OR125033.1_Elaeis_guineensis_isolate_J425_chloroplast,_complete_genome	59	p1	(A)10	10	125080	125089	ndhH - rps15	intergenic
OR125033.1_Elaeis_guineensis_isolate_J425_chloroplast,_complete_genome	60	p1	(T)16	16	126599	126614	ycf1	protein coding
OR125033.1_Elaeis_guineensis_isolate_J425_chloroplast,_complete_genome	61	p3	(ATA)6	18	127696	127713	ycf1	protein coding
OR125033.1_Elaeis_guineensis_isolate_J425_chloroplast,_complete_genome	62	p1	(T)10	10	128385	128394	ycf1	protein coding
OR125033.1_Elaeis_guineensis_isolate_J425_chloroplast,_complete_genome	63	p1	(T)11	11	128891	128901	ycf1	protein coding
OR125033.1_Elaeis_guineensis_isolate_J425_chloroplast,_complete_genome	64	p1	(A)10	10	129009	129018	ycf1	protein coding
OR125033.1_Elaeis_guineensis_isolate_J425_chloroplast,_complete_genome	65	p1	(A)10	10	156951	156960	rps19 - psbA	intergenic
